# Supplementary material for: Nephrolithiasis and Osteoporosis Associated with Hypophosphatemia Caused by Mutations in the Type 2a Sodium–Phosphate Cotransporter
Source: Atypon-hosted journal article supplement (doi:10.1056/nejmoa020028), 2002-09-25
Supplement: nejm_prie_983sa1.pdf [file nejm_prie_983sa1.pdf]

## Supplementary Appendix

This appendix has been provided by the authors to give readers additional information about their work.

Supplement to: Prié D, Huart V, Bakouh N, et al. Nephrolithiasis and osteoporosis associated with hypophosphatemia caused by mutations in the type 2a sodium–phosphate cotransporter. *N Engl J Med* 2002;347:983-91.

**Supplement to Prié D et al. Nephrolithiasis and Osteoporosis Associated with Hypophosphatemia Caused by Mutations in the Type 2a Sodium–Phosphate Cotransporter. N Engl J Med 2002;347:983-91.**

**Supplementary Appendix 1.** Sequences of Primers Used to Amplify the Coding Region of the *NPT2a* Gene.

|         | Primer Sequence                          | Amplified Region               |
|---------|------------------------------------------|--------------------------------|
| Forward | 5' GACC TGA CCA TAG ATT CCC CAT GC 3'    | Promoter and exon I            |
| Reverse | 5' TTC GAT CTG TGT CCT ATC GCG CC 3'     |                                |
| Forward | 5' TTT GTG CAG GTG AGG TGT GTG GG 3'     | Exon II                        |
| Reverse | 5' GGA ACA GGC GGG GGA AGT GGC 3'        |                                |
| Forward | 5' CCG CCT GTT CCT CCC CGC CTC 3'        | Exon III                       |
| Reverse | 5' CCA TGA GCA TAG TGG GCA GAG 3'        |                                |
| Forward | 5' GTG GCA AGA GGC GGC AGC AGT 3'        | Exon IV                        |
| Reverse | 5' AGC ATT GTC CAA GGC CCT TCA 3'        |                                |
| Forward | 5' AGG AGA CCT GGG AGG GGT TCC 3'        | Exon V                         |
| Reverse | 5' AAG CTC TTC CCC ACC CTG G 3'          |                                |
| Forward | 5' ACG TGG GTC CGA ACA GGA GTT GTG 3'    | Exons VI and VII               |
| Reverse | 5' ATC ACG GCC ACC ATG GAT GTT GAA 3'    |                                |
| Forward | 5' GTG CTG GTC CTG CTG CCC CTG 3'        | Exons VII and VIII             |
| Reverse | 5' TGA AAC CAA GAG TCT GAA GAG GGA 3'    |                                |
| Forward | 5' CCC CAA CCT CAG GCT GTG TTT 3'        | Exons IX and X                 |
| Reverse | 5' CCC AGT CCT GTG CCC TGC CCA 3'        |                                |
| Forward | 5' CCT GCA CTA GGG ATG CGG TTT 3'        | Exons XI and XII               |
| Reverse | 5' TGG ACA GCT TCT CCC TGG GGC 3'        |                                |
| Forward | 5' CAG GGC TGG CAG GGA AAG GGC 3'        | Exon XII                       |
| Reverse | 5' TTG TAG GCC CAC ACC CAG AGG 3'        |                                |
| Forward | 5' CCA GTG CCC ATC TCA GCC CTC 3'        | Exon XIII                      |
| Reverse | 5' GCG GGT GAT GAG GTG GTC CAG 3'        |                                |
| Forward | 5' CAA CAT CTC GGG TAT CT TCT GTG GT 3'  | Exon XIII and noncoding 3' end |
| Reverse | 5' CAC ACA CAC CGA CAC TCT CAC ACA AG 3' |                                |
| Forward | 5' CTG GGT GCC AGT CTC TCC TTC TGT AG3'  | Noncoding 3' end               |
| Reverse | 5' TCA GGC AAG TGT TGG GAA GGG AAT 3'    |                                |
